# Supplementary material for: Origin of the anisotropic-strain-driven photoresponse enhancement in inorganic halide-based self-powered flexible photodetectors
Source: Royal Society of Chemistry journal article supplement (doi:10.1039/d1mh02055b), 2022-01-01
Supplement: d1mh02055b1.pdf [file d1mh02055b1.pdf]

Supplementary Information

**Origin of anisotropic-strain-driven photoresponse enhancement  
in inorganic-halide-based self-powered flexible photodetectors**

Da Bin Kim,<sup>a</sup> Ju Han,<sup>a</sup> Ye Seul Jung,<sup>a</sup> Kwan Sik Park,<sup>a</sup> Youngseo Park,<sup>b</sup>  
Junseok Heo<sup>b</sup> and Yong Soo Cho<sup>\*a</sup>

<sup>a</sup>Department of Materials Science and Engineering, Yonsei University, Seoul 03722, Korea

<sup>b</sup>Department of Electrical and Computer Engineering, Ajou University, Suwon 16499, Korea

\*Corresponding author: [ycho@yonsei.ac.kr](mailto:ycho@yonsei.ac.kr)

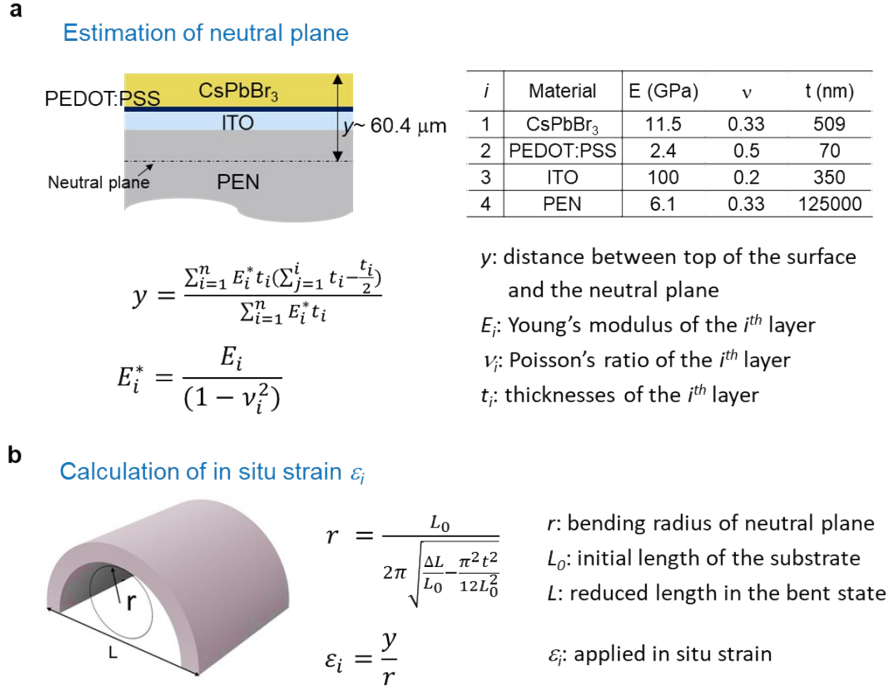

**Fig. S1.** Estimation procedure of (a) neutral plane and (b) in situ strain  $\varepsilon_i$ , according to the equations used for the estimation with the definitions of parameters.

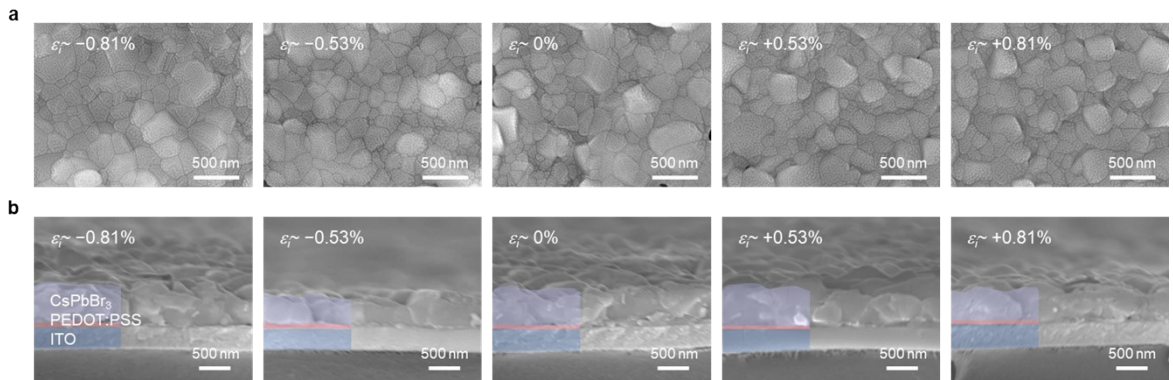

**Fig. S2.** (a) Surface SEM images and (b) cross-sectional images of CsPbBr<sub>3</sub> thin films processed with in situ strain  $\varepsilon_i$  from  $-0.81\%$  to  $+0.81\%$ .

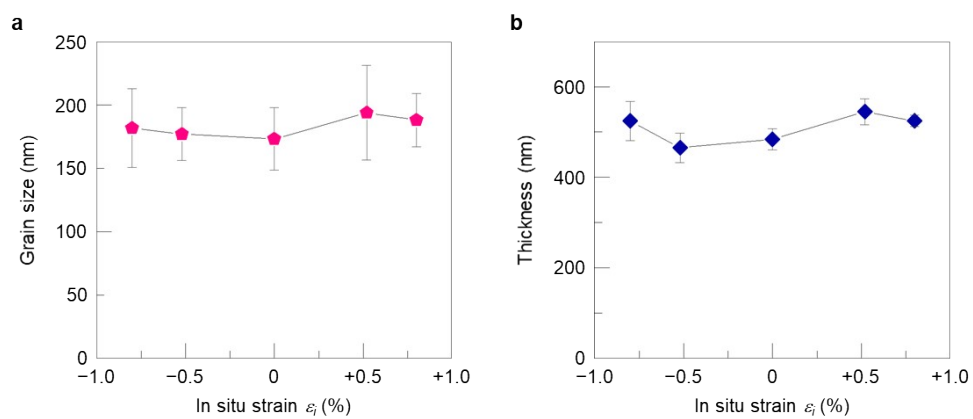

**Fig. S3.** Variations in (a) average grain size and (b) thickness of the CsPbBr<sub>3</sub> thin films processed with in situ strain  $\epsilon_i$  from  $-0.81\%$  to  $+0.81\%$ .

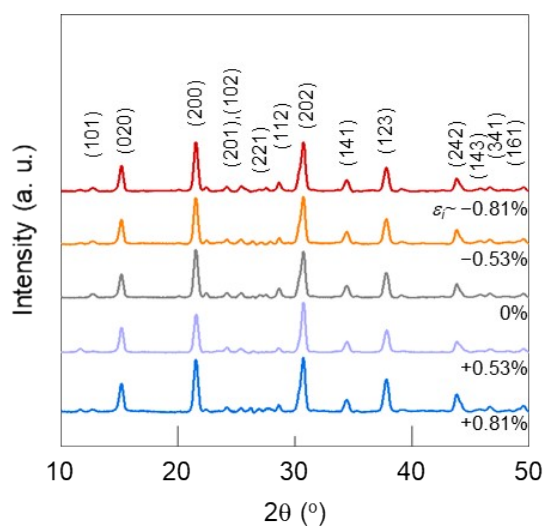

**Fig. S4.** HR-XRD patterns of the CsPbBr<sub>3</sub> thin films processed with different in situ strain.

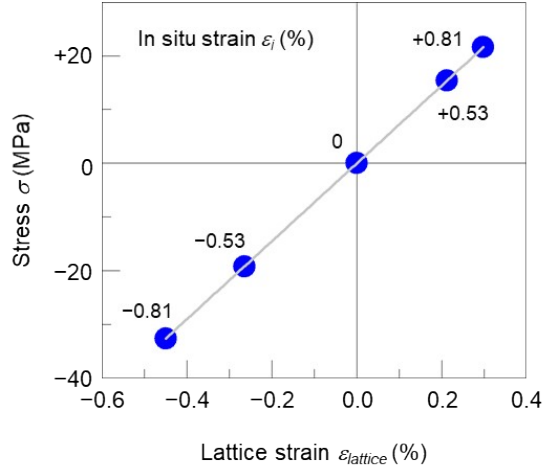

**Fig. S5.** Dependence of in situ strain  $\varepsilon_i$  with the estimated stress  $\sigma$  for the strained CsPbBr<sub>3</sub> thin films. Here,  $\sigma$  was calculated according to the biaxial strain model using the following equation<sup>1</sup> of  $\sigma = \left[ \frac{2C_{13} - C_{33}}{C_{13}} \frac{(C_{11} + C_{12})}{C_{13}} \right] \frac{(b - b_0)}{b_0}$ , where  $C_{ij}$  is the elastic stiffness constant of CsPbBr<sub>3</sub> ( $i$  and  $j = 1, 2$  or  $3$ ),<sup>2</sup> and  $b$  and  $b_0$  are the lattice constants for the strained and unstrained films, respectively.

#### Reference

1. Choi, H.J., Jung, Y.S., Han, J., and Cho, Y.S. (2020). In-situ stretching strain-driven high piezoelectricity and enhanced electromechanical energy-harvesting performance of a ZnO nanorod-array structure. *Nano Energy* 72, 104735.
2. Lee, J.H., Deng, Z., Bristowe, N.C., Bristowe, P.D., and Cheetham, A.K. (2018). The competition between mechanical stability and charge carrier mobility in MA-based hybrid perovskites: Insight from DFT. *J. Mater. Chem. C* 6, 12252-12259.

**Table S1.** Structural information of the strained CsPbBr<sub>3</sub> thin films, which were extracted from the HR-XRD results.

| In situ strain<br>$\varepsilon_i$ (%) | Lattice constant ( $\text{\AA}$ ) |          |         | Volume<br>V ( $\text{\AA}^3$ ) | $\Delta V$<br>(%) | Stress<br>$\sigma$ (MPa) |
|---------------------------------------|-----------------------------------|----------|---------|--------------------------------|-------------------|--------------------------|
|                                       | a                                 | b        | c       |                                |                   |                          |
| -0.81                                 | 8.24607                           | 11.67378 | 8.25939 | 795.07                         | -0.72             | -32.6                    |
| -0.53                                 | 8.25939                           | 11.69552 | 8.25718 | 797.63                         | -0.40             | -19.2                    |
| 0                                     | 8.27340                           | 11.72634 | 8.25475 | 800.85                         | 0.00              | 0.0                      |
| +0.53                                 | 8.28594                           | 11.75148 | 8.25368 | 803.68                         | 0.35              | 15.4                     |
| +0.81                                 | 8.29118                           | 11.76146 | 8.25358 | 804.86                         | 0.50              | 21.6                     |

**Table S2.** Estimated values of strain field over 25-mm-long CsPbBr<sub>3</sub> thin films, which depend on the applied in situ strain ranging from  $-0.81\%$  to  $+0.81\%$ .

| In situ strain (%)<br>x-position (mm) | -0.81 | -0.53 | 0    | +0.53 | +0.81 |
|---------------------------------------|-------|-------|------|-------|-------|
| 0                                     | 0.00  | -0.00 | 0.00 | 0.00  | 0.00  |
| 0.5                                   | -0.03 | -0.02 | 0.00 | 0.02  | 0.03  |
| 1                                     | -0.07 | -0.04 | 0.00 | 0.04  | 0.07  |
| 1.5                                   | -0.10 | -0.07 | 0.00 | 0.07  | 0.10  |
| 2                                     | -0.12 | -0.09 | 0.00 | 0.09  | 0.12  |
| 2.5                                   | -0.16 | -0.11 | 0.00 | 0.11  | 0.16  |
| 3                                     | -0.19 | -0.13 | 0.00 | 0.13  | 0.19  |
| 3.5                                   | -0.22 | -0.14 | 0.00 | 0.14  | 0.22  |
| 4                                     | -0.26 | -0.16 | 0.00 | 0.16  | 0.26  |
| 4.5                                   | -0.29 | -0.19 | 0.00 | 0.19  | 0.29  |
| 5                                     | -0.32 | -0.21 | 0.00 | 0.21  | 0.32  |
| 5.5                                   | -0.35 | -0.23 | 0.00 | 0.23  | 0.35  |
| 6                                     | -0.38 | -0.25 | 0.00 | 0.25  | 0.38  |
| 6.5                                   | -0.41 | -0.27 | 0.00 | 0.27  | 0.41  |
| 7                                     | -0.45 | -0.29 | 0.00 | 0.29  | 0.45  |
| 7.5                                   | -0.48 | -0.32 | 0.00 | 0.32  | 0.48  |
| 8                                     | -0.51 | -0.34 | 0.00 | 0.34  | 0.51  |
| 8.5                                   | -0.55 | -0.36 | 0.00 | 0.36  | 0.55  |
| 9                                     | -0.57 | -0.38 | 0.00 | 0.38  | 0.57  |
| 9.5                                   | -0.60 | -0.40 | 0.00 | 0.40  | 0.60  |
| 10                                    | -0.64 | -0.42 | 0.00 | 0.42  | 0.64  |
| 10.5                                  | -0.68 | -0.44 | 0.00 | 0.44  | 0.68  |
| 11                                    | -0.71 | -0.47 | 0.00 | 0.47  | 0.71  |
| 11.5                                  | -0.74 | -0.49 | 0.00 | 0.49  | 0.74  |
| 12                                    | -0.78 | -0.51 | 0.00 | 0.51  | 0.78  |
| 12.5                                  | -0.81 | -0.53 | 0.00 | 0.53  | 0.81  |
| 13.0                                  | -0.78 | -0.51 | 0.00 | 0.51  | 0.78  |
| 13.5                                  | -0.74 | -0.49 | 0.00 | 0.49  | 0.74  |
| 14.0                                  | -0.71 | -0.47 | 0.00 | 0.47  | 0.71  |
| 14.5                                  | -0.68 | -0.44 | 0.00 | 0.44  | 0.68  |
| 15                                    | -0.64 | -0.42 | 0.00 | 0.42  | 0.64  |
| 15.5                                  | -0.60 | -0.40 | 0.00 | 0.40  | 0.60  |
| 16                                    | -0.57 | -0.38 | 0.00 | 0.38  | 0.57  |
| 16.5                                  | -0.55 | -0.36 | 0.00 | 0.36  | 0.55  |
| 17                                    | -0.51 | -0.34 | 0.00 | 0.34  | 0.51  |
| 17.5                                  | -0.48 | -0.32 | 0.00 | 0.32  | 0.48  |
| 18                                    | -0.45 | -0.29 | 0.00 | 0.29  | 0.45  |
| 18.5                                  | -0.41 | -0.27 | 0.00 | 0.27  | 0.41  |
| 19                                    | -0.38 | -0.25 | 0.00 | 0.25  | 0.38  |
| 19.5                                  | -0.35 | -0.23 | 0.00 | 0.23  | 0.35  |
| 20                                    | -0.32 | -0.21 | 0.00 | 0.21  | 0.32  |
| 20.5                                  | -0.29 | -0.19 | 0.00 | 0.19  | 0.29  |
| 21                                    | -0.26 | -0.16 | 0.00 | 0.16  | 0.26  |
| 21.5                                  | -0.22 | -0.14 | 0.00 | 0.14  | 0.22  |
| 22                                    | -0.19 | -0.13 | 0.00 | 0.13  | 0.19  |
| 22.5                                  | -0.16 | -0.11 | 0.00 | 0.11  | 0.16  |
| 23                                    | -0.12 | -0.09 | 0.00 | 0.09  | 0.12  |
| 23.5                                  | -0.10 | -0.07 | 0.00 | 0.07  | 0.10  |
| 24                                    | -0.07 | -0.04 | 0.00 | 0.04  | 0.07  |
| 24.5                                  | -0.03 | -0.02 | 0.00 | 0.02  | 0.03  |
| 25                                    | 0.00  | 0.00  | 0.00 | 0.00  | 0.00  |

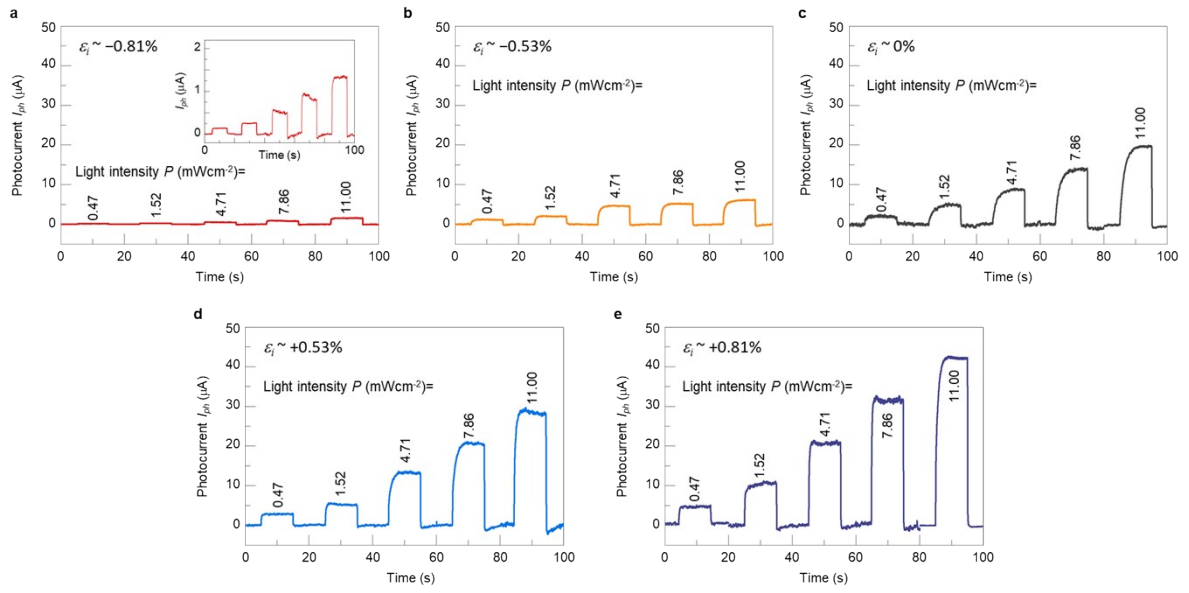

**Fig. S6.** Photocurrent-time behavior for photodetectors based on the strained CsPbBr<sub>3</sub> thin films under various light intensities from 0.47 to 11.0 mWcm<sup>-2</sup>.

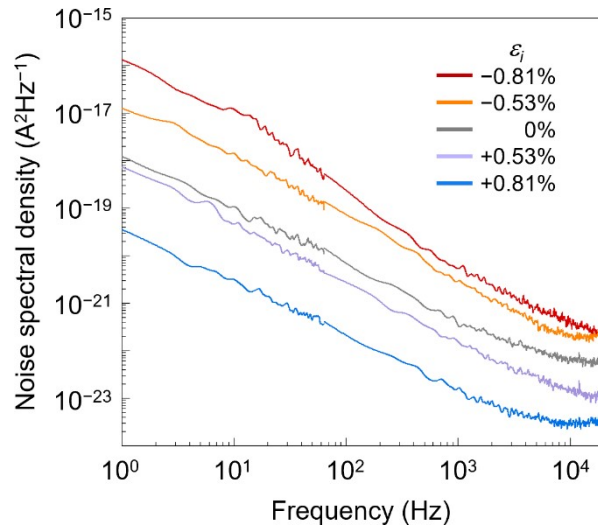

**Fig. S7.** Noise spectral density as a function of frequency for the strained CsPbBr<sub>3</sub> photodetectors.

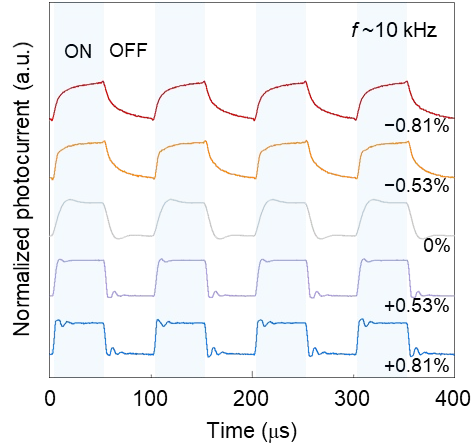

**Fig. S8.** Normalized photoresponse curves obtained at a fixed frequency of 10 kHz using a 470 nm-light source for the strained CsPbBr<sub>3</sub> photodetectors.

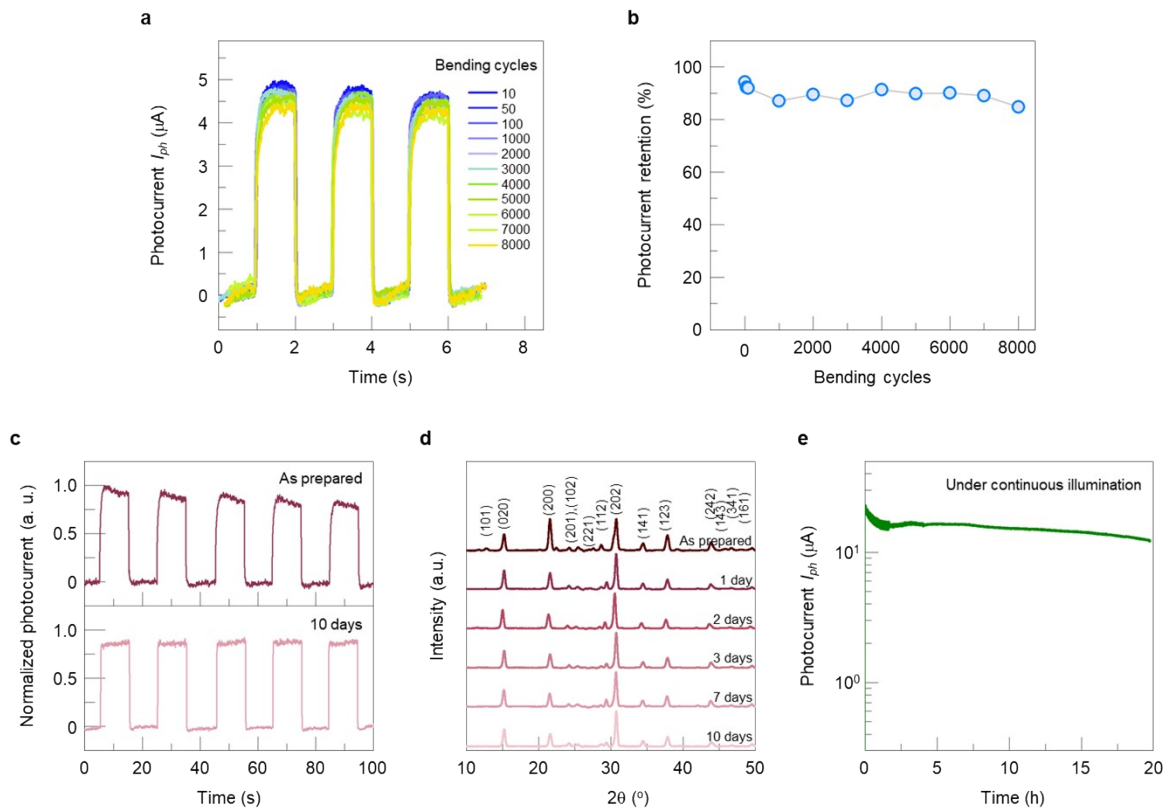

**Fig. S9.** (a) The photocurrent  $I_{ph}$ -time behavior of the +0.81%-strained CsPbBr<sub>3</sub> photodetector after repetitive bending up to 8000 cycles at a compressive bending strain of  $\sim 1.01\%$ , (b) photocurrent retention compared to the initial  $I_{ph}$  with the progress of bending operation up to 8000 cycles, (c) normalized photocurrent-time and (d) HR-XRD patterns of the +0.81%-strained CsPbBr<sub>3</sub> photodetector after atmosphere exposure for 10 days at room temperature with a relative humidity of  $60 \pm 5\%$ , and (e) the photocurrent detected with the extended time of 20 h under the continuous light illumination at  $4.71 \text{ mWcm}^{-2}$  for the +0.81%-strained CsPbBr<sub>3</sub> photodetector.

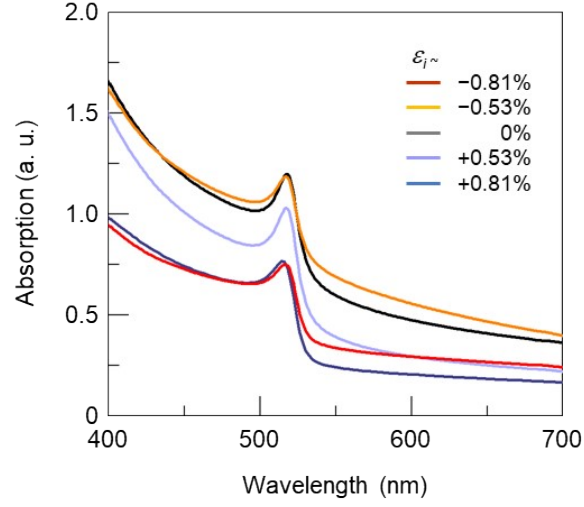

**Fig.S10.** Absorption spectra of the CsPbBr<sub>3</sub> thin films processed with in situ strain  $\varepsilon_i$  ranging from  $-0.81\%$  to  $+0.81\%$ .

**Table S3.** Energy band levels with respect to the vacuum level as determined by the UPS spectra (here, SECO is the secondary electron cut-off region,  $E_F$  is the Fermi level, LBE is the low binding energy,  $E_v$  is the valence band edge,  $E_g$  is the optical energy bandgap, and  $E_c$  is the conduction band edge)

| In situ strain $\varepsilon_i$ (%) | SECO   | $E_F$  | LBE  | $E_v$  | $E_g$ | $E_c$  |
|------------------------------------|--------|--------|------|--------|-------|--------|
| -0.81                              | 17.408 | -3.792 | 1.80 | -5.592 | 2.317 | -3.275 |
| -0.53                              | 17.203 | -3.997 | 1.85 | -5.847 | 2.324 | -3.523 |
| 0                                  | 17.163 | -4.037 | 1.90 | -5.937 | 2.328 | -3.609 |
| +0.53                              | 17.077 | -4.123 | 1.95 | -6.073 | 2.336 | -3.737 |
| +0.81                              | 16.916 | -4.284 | 2.00 | -6.284 | 2.340 | -3.944 |



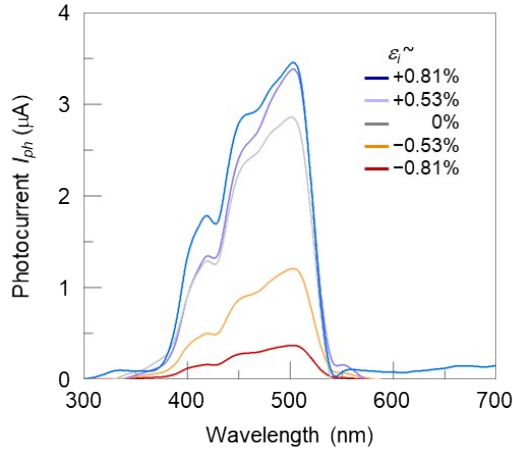

**Fig. S11.** Photocurrent as a function of incident wavelength for the strained CsPbBr<sub>3</sub> photodetectors.

**Table S4.** Estimated variations of crystal-structural attributes in the perovskite CsPbBr<sub>3</sub> structure for the different in situ strain  $\varepsilon_i$  ranging from  $-0.81\%$  to  $+0.81\%$ .

| In situ strain $\varepsilon_i$ (%)                    | -0.81    | -0.53    | 0        | +0.53    | +0.81    |
|-------------------------------------------------------|----------|----------|----------|----------|----------|
| Average Pb-Br bond length (Å)                         | 2.9681   | 2.9713   | 2.9753   | 2.9787   | 2.9802   |
| PbBr <sub>6</sub> octahedron volume (Å <sup>3</sup> ) | 34.8599  | 34.9718  | 35.1131  | 35.2372  | 35.2890  |
| Pb-Br-Pb <sub>equatorial</sub> bond angle (°)         | 164.3206 | 164.3530 | 164.3977 | 164.4322 | 164.4453 |
| Pb-Br-Pb <sub>apical</sub> bond angle (°)             | 156.6900 | 156.6833 | 156.6724 | 156.6643 | 156.6613 |

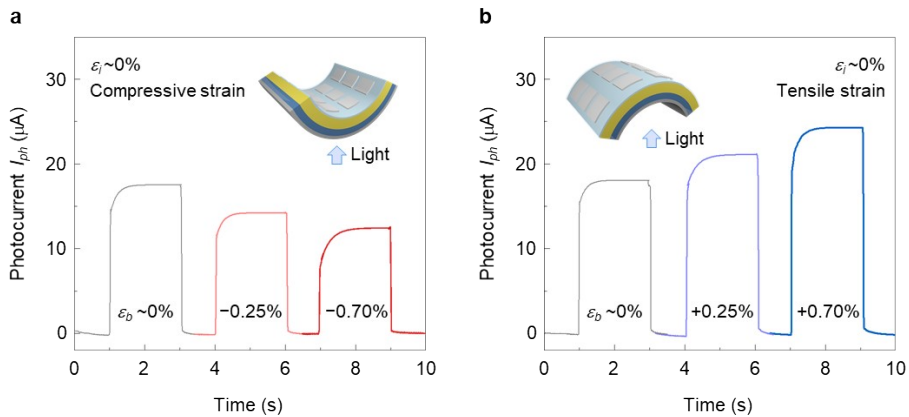

**Fig. S12.** Time-dependent photoresponse of the photodetectors processed with no in situ strain, but subject to post-bending in either (a) concave or (b) convex manner to create compressive or tensile strain, respectively. The photocurrent was measured at the light intensity  $P$  of  $11.0 \text{ mW/cm}^2$  in the state of the post-bending.
